# Supplementary material
Source: MDPI journal article supplement (https://www.mdpi.com/1996-1073/11/11/3045)
Supplement: s1 [file s1]

# Supplementary Information

## Molecular Modeling of CO<sub>2</sub> and *n*-octane in Solubility Process and $\alpha$ -quartz Nanoslit

Jun Pu <sup>1,2,3,4,\*</sup>, Xuejie Qin <sup>1,2</sup>, Feifei Gou <sup>1,2</sup>, Wenchao Fang <sup>1,2</sup>, Fengjie Peng <sup>5</sup>, Runxi Wang <sup>5,\*</sup> and Zhaoli Guo <sup>5</sup>

- <sup>1</sup> State Key Laboratory of Shale Oil and Gas Enrichment Mechanisms and Effective Development, Beijing 100083, China; qinxj.syky@sinopec.com (X.Q.); gouff.syky@sinopec.com (F.G.); fangwc.syky@sinopec.com (W.F.)  
<sup>2</sup> State Energy Center for Shale Oil Research and Development, Beijing 100083, China  
<sup>3</sup> Institute of Porous Flow and Fluid Mechanics, Chinese Academy of Science, Langfang 065007, Hebei, China  
<sup>4</sup> University of Chinese Academy of Science, Beijing 100190, China  
<sup>5</sup> School of Energy and Power Engineering, Huazhong University of Science and Technology (HUST), Wuhan 430074, China; fengjiepeng@hust.edu.cn (F.P.); zlguo@hust.edu.cn (Z.G.)  
\* Correspondence: pujun.syky@sinopec.com (J.P.); rx\_wang@hust.edu.cn (R.W.)

**Table S1.** Lennard-Jones parameters and charges for the CO<sub>2</sub> and *n*-octane.

|                                     | $\sigma$ (nm) | $\epsilon$ (kJ/mol) | $q$ (e) |
|-------------------------------------|---------------|---------------------|---------|
| C (CO <sub>2</sub> )                | 0.2800        | 0.2340              | +0.6516 |
| O (CO <sub>2</sub> )                | 0.3028        | 0.6682              | -0.3258 |
| CH <sub>3</sub> ( <i>n</i> -octane) | 0.3910        | 0.8647              | 0.0000  |
| CH <sub>2</sub> ( <i>n</i> -octane) | 0.3930        | 0.3808              | 0.0000  |

**Table S2.** Lennard-Jones parameters and charges for  $\alpha$ -quartz.

|                             | $\sigma$ (nm) | $\epsilon$ (kJ/mol)  | $q$ (e) |
|-----------------------------|---------------|----------------------|---------|
| Si                          | 0.3303        | $7.7 \times 10^{-6}$ | +2.1000 |
| O <sub>B</sub> <sup>1</sup> | 0.3166        | 0.6506               | -1.0500 |
| O <sub>H</sub> <sup>2</sup> | 0.3166        | 0.6506               | -0.9500 |
| H                           | 0.0000        | 0.0000               | +0.4250 |

<sup>1</sup> OB refers to the bridging oxygen. <sup>2</sup> OH refers to the hydroxyl oxygen.

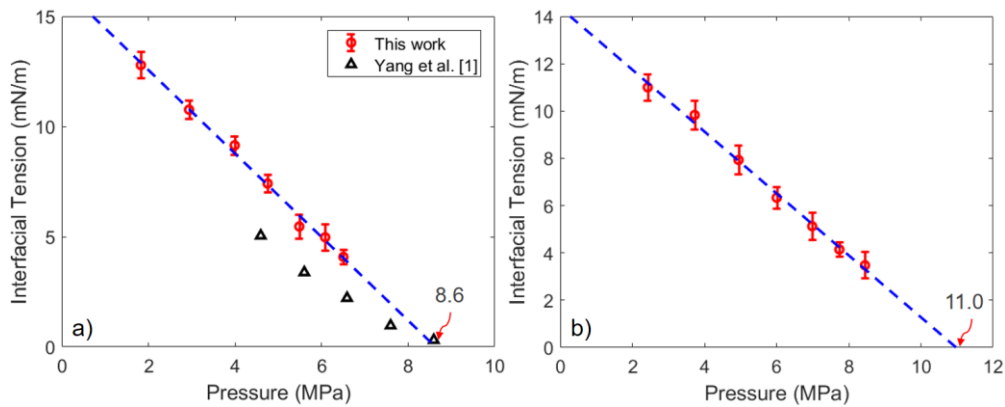

**Figure S1.** Interfacial tensions of CO<sub>2</sub> + *n*-octane binary system as a function of the pressure at (a) 323.15K and (b) 348.25 K. Red circles are the simulation results. Black triangles are the experimental results of Yang et al [1]. Blue dash line comes from the linear fitting: IFT =  $-1.894P + 16.3526$  (323.15K) and IFT =  $-1.3089P + 14.3639$  (348.25K).

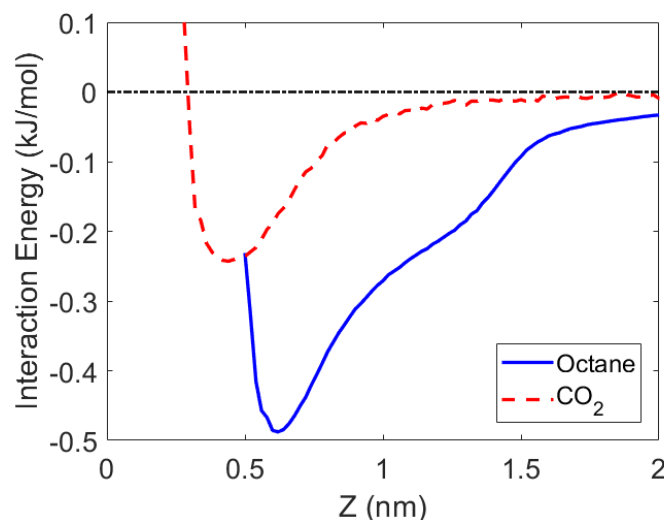

**Figure S2.** The interaction energy of *n*-octane and CO<sub>2</sub> on  $\alpha$ -quartz surface.

To understand the stronger adsorption of CO<sub>2</sub>, the interaction energies of *n*-octane and CO<sub>2</sub> on  $\alpha$ -quartz surface are calculated. The interaction energy consists of two parts: van der Waals interaction (Lennard-Jones potential in this work) and Coulomb interaction. Although the potential well of *n*-octane is lower, the following three reasons still make CO<sub>2</sub> easier to adsorb on the surface of  $\alpha$ -quartz: (1) the position of CO<sub>2</sub> potential well is closer to the surface, which will mainly determine the position of adsorbed layer. This position is affected by the parameter  $\sigma$  in Lennard-Jones potential. Other impact parameters include orientation of molecules, rigidity of molecules and so on. (2) The volume of CO<sub>2</sub> is small that CO<sub>2</sub> is easily absorbed in the gap between oil and  $\alpha$ -quartz surface, which is determined by the size of molecules. Mehana et al. also found that the molecular size of the gas plays an important role in the adsorption process [2]. (3) This interaction energy is the interaction of whole molecule with  $\alpha$ -quartz surface. The lower potential well is mainly because there are more atoms in oil molecule. If the interaction energy per atom or the interaction energy per unit weight are calculated, the CO<sub>2</sub> potential well will be lower, which is determined by the parameter both  $\sigma$  and  $\epsilon$  in Lennard-Jones potential.

## Reference

1. Yang, Z.; Li, M.; Peng, B.; Lin, M.; Dong, Z.; Ling, Y. Interfacial tension of CO<sub>2</sub> and organic liquid under high pressure and temperature. *Chin. J. Chem. Eng.* **2014**, *22*, 1302–1306, doi:10.1016/j.cjche.2014.09.042.
2. Mehana, M.; Fahes, M.; Huang, L. The Density of Oil/Gas Mixtures: Insights From Molecular Simulations. *SPE Journal* **2018**, 10.2118/187297-PA, doi:10.2118/187297-PA.
